# Supplementary material for: Comparative plastome analyses and evolutionary relationships of 25 East Asian species within the medicinal plant genus Scrophularia (Scrophulariaceae)
Source: Front Plant Sci. 2024 Sep 3;15:1439206. doi: 10.3389/fpls.2024.1439206 (PMC11411265; doi:10.3389/fpls.2024.1439206)
Supplement: Supplementary file 6 [file Table6.xlsx]

## Sheet: repeat
Supplementary Table 6. Analyses of repeat sequences in 25 East Asian Scrophularia plastomes.
F		S. alaschanica				S. amgunensis				S. buergeriana				S. chasmophila				S. delavayi				S. elatior				S. fargesii				S. henryi				S. heucheriiflora				S. hypsophila				S. jinii				S. kakudensis
		length	start position	start position		length	start position	start position		length	start position	start position		length	start position	start position		length	start position	start position		length	start position	start position		length	start position	start position		length	start position	start position		length	start position	start position		length	start position	start position		length	start position	start position		length	start position	start position
	1	41	97424	118556	F	46	47523	47538	F	42	44009	119650	F	41	98107	118858	F	41	98414	119559	F	41	98620	119747	F	41	97811	118942	F	41	98385	119517	F	41	97902	119066	F	41	97853	118590	F	41	97704	118819	F	42	43953	119551	F
	2	40	90422	90458	F	41	98566	119696	F	41	98494	119651	F	40	91105	91141	F	40	91412	91448	F	40	91618	91654	F	40	90809	90845	F	40	91383	91419	F	40	90897	90933	F	40	90851	90887	F	40	90702	90738	F	41	98375	119552	F
	3	40	144689	144725	F	40	91564	91600	F	41	44010	98494	F	40	145028	145064	F	40	145733	145769	F	40	145931	145967	F	40	145121	145157	F	40	145713	145749	F	40	145223	145259	F	40	144779	144815	F	40	145004	145040	F	41	43954	98375	F
	4	39	43184	97426	F	40	145864	145900	F	40	91491	91527	F	39	43947	98109	F	39	43997	98416	F	39	44147	98622	F	39	43361	97813	F	39	43947	98387	F	39	43967	97904	F	39	43940	97855	F	39	43340	97706	F	40	91373	91409	F
	5	39	43184	118558	F	39	44049	98568	F	40	145836	145872	F	39	43947	118860	F	39	43997	119561	F	39	44147	119749	F	39	43361	118944	F	39	43947	119519	F	39	43967	119068	F	39	43940	118592	F	39	43340	118821	F	40	145721	145757	F
	6	36	90420	90438	F	39	44049	119698	F	36	91489	91507	F	36	91103	91121	F	36	91410	91428	F	38	42881	42899	F	36	12763	12798	F	36	91381	91399	F	36	90895	90913	F	36	90849	90867	F	36	90700	90718	F	36	46749	46762	F
	7	36	144713	144731	F	36	91562	91580	F	36	145860	145878	F	36	145052	145070	F	36	145757	145775	F	36	91616	91634	F	36	90807	90825	F	36	145737	145755	F	36	145247	145265	F	36	144803	144821	F	36	145028	145046	F	36	91371	91389	F
	8	34	90440	90458	F	36	145888	145906	F	34	91509	91527	F	34	91123	91141	F	34	91430	91448	F	36	145955	145973	F	36	145145	145163	F	34	91401	91419	F	34	90915	90933	F	34	90869	90887	F	34	90720	90738	F	36	145745	145763	F
	9	34	144695	144713	F	34	91582	91600	F	34	145842	145860	F	34	145034	145052	F	34	145739	145757	F	34	91636	91654	F	34	90827	90845	F	34	145719	145737	F	34	145229	145247	F	34	144785	144803	F	34	145010	145028	F	34	91391	91409	F
	10	32	7504	35057	F	34	145870	145888	F	32	8308	35819	F	31	8276	35810	F	32	8313	35822	F	34	145937	145955	F	34	145127	145145	F	32	8246	35784	F	32	8247	35830	F	31	8280	35809	F	32	7873	35206	F	34	145727	145745	F
	11	30	43196	97438	F	32	8345	35878	F	30	37494	37521	F	30	43959	98121	F	30	44009	98428	F	32	8321	35909	F	32	7868	35219	F	30	43959	98399	F	31	68826	74855	F	30	43952	97867	F	30	43352	97718	F	32	8284	35789	F
	12	30	9052	35948	F	31	47523	47553	F	30	44024	98508	F	30	9841	36704	F	30	9867	36715	F	32	14075	14097	F	30	43373	97825	F	30	122315	122336	F	31	75304	138261	F	30	9843	36700	F	30	9442	36091	F	30	43968	98389	F
	13	30	38180	40404	F	30	44061	98580	F	30	9870	36711	F	30	16366	16367	F	30	38947	41171	F	32	42876	46955	F	30	9437	36105	F	30	9793	36668	F	30	43979	97916	F	30	38937	41161	F	30	38314	40538	F	30	9846	36681	F
	14	30	43196	118570	F	30	9904	36770	F	30	38970	41194	F	30	38940	41164	F	30	44009	119573	F	31	42806	42836	F	30	38329	40553	F	30	38900	41124	F	30	109167	109191	F	30	43952	118604	F	30	43352	118833	F	30	38913	41137	F
	15	30	88008	88050	F	30	39008	41232	F	30	44024	119665	F	30	43959	118872	F	30	88992	89034	F	30	42576	42593	F	30	43373	118956	F	30	43959	119531	F	30	9836	36715	F	30	61867	61881	F	30	88288	88330	F	30	43968	119566	F
	16	30	90421	90475	F	30	44061	119710	F	30	89077	89119	F	30	62388	62402	F	30	91411	91465	F	30	44159	98634	F	30	88395	88437	F	30	88963	89005	F	30	38934	41158	F	30	88437	88479	F	30	90701	90755	F	30	88959	89001	F
	17	30	90450	90468	F	30	89150	89192	F	30	91490	91544	F	30	88691	88733	F	30	91440	91458	F	30	9879	36800	F	30	90808	90862	F	30	91382	91436	F	30	88483	88525	F	30	90850	90904	F	30	90730	90748	F	30	91372	91426	F
	18	30	144682	144736	F	30	91563	91617	F	30	91519	91537	F	30	91104	91158	F	30	145726	145780	F	30	39017	41241	F	30	90837	90855	F	30	91411	91429	F	30	90896	90950	F	30	90879	90897	F	30	144997	145051	F	30	91401	91419	F
	19	30	144702	144738	F	30	91592	91610	F	30	145829	145883	F	30	91133	91151	F	30	145746	145782	F	30	44159	119761	F	30	145114	145168	F	30	145706	145760	F	30	90925	90943	F	30	144772	144826	F	30	145017	145053	F	30	145714	145768	F
	20	30	147107	147149	F	30	145857	145911	F	30	145849	145885	F	30	145021	145075	F	30	148157	148199	F	30	89204	89246	F	30	145134	145170	F	30	145726	145762	F	30	145216	145270	F	30	144792	144828	F	30	147422	147464	F	30	145734	145770	F
	21					30	145877	145913	F	30	148254	148296	F	30	145041	145077	F					30	91617	91671	F	30	147539	147581	F	30	148137	148179	F	30	145236	145272	F	30	147197	147239	F					30	148139	148181	F
	22					30	148282	148324	F					30	147446	147488	F					30	91646	91664	F									30	147641	147683	F
	23																					30	145924	145978	F
	24																					30	145944	145980	F
	25																					30	148349	148391	F
P	26	44	73531	73531	P	64	29924	29924	P	44	74611	74611	P	44	74227	74227	P	62	114724	114724	P	44	74740	74740	P	44	73936	73936	P	44	74491	74491	P	44	74015	74015	P	44	73984	73984	P	44	73829	73829	P	44	74495	74495	P
	27	41	118556	137722	P	44	74677	74677	P	41	119651	138868	P	41	118858	138061	P	44	74533	74533	P	41	119747	138964	P	41	118942	138154	P	41	119517	138746	P	41	119066	138253	P	41	118590	137812	P	41	118819	138037	P	41	119552	138754	P
	28	40	90422	144689	P	41	119696	138897	P	41	44010	138868	P	40	91105	145028	P	41	119559	138766	P	40	91618	145931	P	40	90809	145121	P	40	91383	145713	P	40	90897	145223	P	40	90851	144779	P	40	90702	145004	P	41	43954	138754	P
	29	40	90458	144725	P	40	91564	145864	P	40	91491	145836	P	40	91141	145064	P	40	91412	145733	P	40	91654	145967	P	40	90845	145157	P	40	91419	145749	P	40	90933	145259	P	40	90887	144815	P	40	90738	145040	P	40	91373	145721	P
	30	39	43184	137722	P	40	91600	145900	P	40	91527	145872	P	39	43947	138061	P	40	91448	145769	P	39	44147	138964	P	39	43361	138154	P	39	43947	138746	P	39	43967	138253	P	39	43940	137812	P	39	43340	138037	P	40	91409	145757	P
	31	36	90420	144713	P	39	44049	138897	P	38	46847	46847	P	36	91103	145052	P	39	43997	138766	P	36	42875	46952	P	36	90807	145145	P	36	91381	145737	P	36	90895	145247	P	36	90849	144803	P	36	112082	112082	P	38	112772	112772	P
	32	36	90438	144731	P	36	91562	145888	P	36	91489	145860	P	36	91121	145070	P	36	91410	145757	P	36	91616	145955	P	36	90825	145163	P	36	91399	145755	P	36	90913	145265	P	36	90867	144821	P	36	90700	145028	P	36	91371	145745	P
	33	34	90440	144695	P	36	91580	145906	P	36	91507	145878	P	34	91123	145034	P	36	91428	145775	P	36	91634	145973	P	34	74766	74766	P	34	91401	145719	P	34	90915	145229	P	35	46217	46217	P	36	90718	145046	P	36	91389	145763	P
	34	34	90458	144713	P	34	91582	145870	P	34	75441	75441	P	34	91141	145052	P	34	91430	145739	P	34	91636	145937	P	34	90827	145127	P	34	91419	145737	P	34	90933	145247	P	34	90869	144785	P	34	90720	145010	P	34	91391	145727	P
	35	32	74361	74361	P	34	91600	145888	P	34	91509	145842	P	32	75057	75057	P	34	91448	145757	P	34	91654	145955	P	34	90845	145145	P	32	46783	46783	P	32	46257	46257	P	34	90887	144803	P	34	90738	145028	P	34	91409	145745	P
	36	30	7506	44683	P	32	75507	75507	P	34	91527	145860	P	30	8277	45640	P	32	75363	75363	P	32	46955	46955	P	31	46172	46172	P	31	46769	46769	P	31	46243	46243	P	32	46233	46233	P	31	46156	46156	P	32	75325	75325	P
	37	30	43196	137719	P	30	44061	138894	P	30	8310	45698	P	30	43959	138058	P	30	8315	45684	P	31	44776	46786	P	30	7870	45050	P	30	8248	45635	P	31	75304	97904	P	32	74814	74814	P	30	7875	45026	P	31	46752	46765	P
	38	30	35059	44683	P	30	46909	46909	P	30	44024	138865	P	30	35811	45640	P	30	44009	138763	P	31	46940	46940	P	30	43373	138151	P	30	13374	13374	P	31	75304	119068	P	30	8281	45098	P	30	43352	138034	P	31	44587	46598	P
	39	30	88008	147107	P	30	35880	45738	P	30	123129	123129	P	30	88691	147446	P	30	35824	45684	P	30	8323	45825	P	30	7501	7537	P	30	43959	138743	P	30	8249	45118	P	30	43952	137809	P	30	74659	74659	P	31	46752	46752	P
	40	30	88050	147149	P	30	89150	148282	P	30	35821	45698	P	30	88733	147488	P	30	88992	148157	P	30	44159	138961	P	30	35221	45050	P	30	75321	75321	P	30	43979	138250	P	30	35810	45098	P	30	7509	7545	P	31	46765	46765	P
	41	30	90421	144682	P	30	89192	148324	P	30	89077	148254	P	30	91104	145021	P	30	89034	148199	P	30	46955	46955	P	30	88395	147539	P	30	35786	45635	P	30	74844	74844	P	30	88437	147197	P	30	35208	45026	P	30	8286	45642	P
	42	30	90450	144689	P	30	91563	145857	P	30	89119	148296	P	30	91133	145028	P	30	91411	145726	P	30	75570	75570	P	30	88437	147581	P	30	88963	148137	P	30	35832	45118	P	30	88479	147239	P	30	88288	147422	P	30	43968	138751	P
	43	30	90468	144707	P	30	91592	145864	P	30	91490	145829	P	30	91151	145046	P	30	91440	145733	P	30	35911	45825	P	30	90808	145114	P	30	89005	148179	P	30	88483	147641	P	30	90850	144772	P	30	88330	147464	P	30	35791	45642	P
	44	30	90475	144736	P	30	91610	145882	P	30	91519	145836	P	30	91158	145075	P	30	91458	145751	P	30	42899	46952	P	30	90837	145121	P	30	91382	145706	P	30	88525	147683	P	30	90879	144779	P	30	90701	144997	P	30	88959	148139	P
	45					30	91617	145911	P	30	91537	145854	P					30	91465	145780	P	30	89204	148349	P	30	90855	145139	P	30	91411	145713	P	30	90896	145216	P	30	90897	144797	P	30	90730	145004	P	30	89001	148181	P
	46									30	91544	145883	P									30	89246	148391	P	30	90862	145168	P	30	91429	145731	P	30	90925	145223	P	30	90904	144826	P	30	90748	145022	P	30	91372	145714	P
	47																					30	91617	145924	P					30	91436	145760	P	30	90943	145241	P					30	90755	145051	P	30	91401	145721	P
	48																					30	91646	145931	P									30	90950	145270	P									30	91419	145739	P
	49																					30	91664	145949	P																					30	91426	145768	P
	50																					30	91671	145978	P
	51
	52
	53
R	54									39	46847	46847	R					32	9450	75363	R	33	46955	46955	R																	34	46172	46172	R
	55									37	46847	46847	R
	56									31	46825	46825	R
	57
C	58									30	46834	46835	C									30	42861	46941	C													32	46231	46232	C
	59									41	46847	46848	C
	60
[truncated: 52 more columns]

## Sheet: statistics
Species	Foward repeats	Palindromic repeats	Reverse repeats	Complimentary repeats	30-39 bp	40-49 bp	50bp and above
S. alaschanica	20	19			32	7
S. amgunensis	22	20			33	8	1
S. buergeriana	21	21	3	2	36	11
S. chasmophila	22	19			34	7
S. delavayi	20	20	1		33	7	1
S. elatior	25	25	1	1	45	7
S. fargesii	21	21			35	7
S. henryi	21	22			36	7
S. heucheriiflora	22	23			38	7
S. hypsophila	21	21		1	36	7
S. jinii	20	22	1		36	7
S. kakudensis	21	24			35	10
S. lijiangensis	18	19	1	1	25	10	4
S. mandarinorum	18	22		1	27	10	4
S. mapienensis	24	28	1		40	10	3
S. modesta	21	22	2	1	38	8
S. moellendorffii	23	21	1	1	38	7	1
S. musashiensis	21	22	1		37	7
S. ningpoensis	22	22	1		35	10
S. spicata	18	21	1	1	27	10	4
S. stylosa	21	19			33	7
S. taihangshanensis	20	21			34	7
S. wattii	21	20		1	35	7
S. yoshimurae	21	23	1		34	10	1
S. yunnanensis	19	19			31	7
